# Supplementary material for: Preparation of tris(azolyl)phosphine gold(i) complexes: digold(i) coordination and variation in solid state intermolecular interactions
Source: Royal Society of Chemistry journal article supplement (doi:10.1039/b709896k), 2007-09-14
Supplement: b709896k.pdf [file b709896k.pdf]

## Supporting Information

### Preparation of tris(azole)phosphine gold(I) complexes: Digold(I) coordination and variation in solid state intermolecular interactions

Christoph E. Strasser, William F. Gabrielli, Catherine Esterhuysen, Oliver B. Schuster,  
Stefan D. Nogai, Stephanie Cronje and Helgard G. Raubenheimer\*

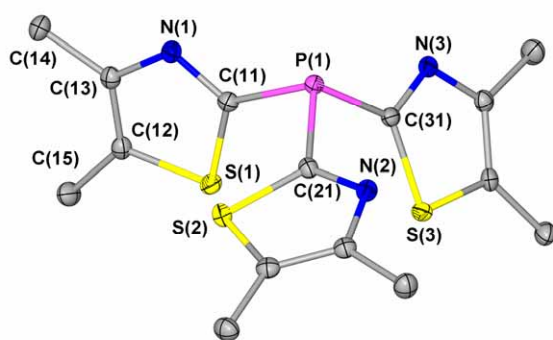

Fig. S1 Molecular structure of 1d.

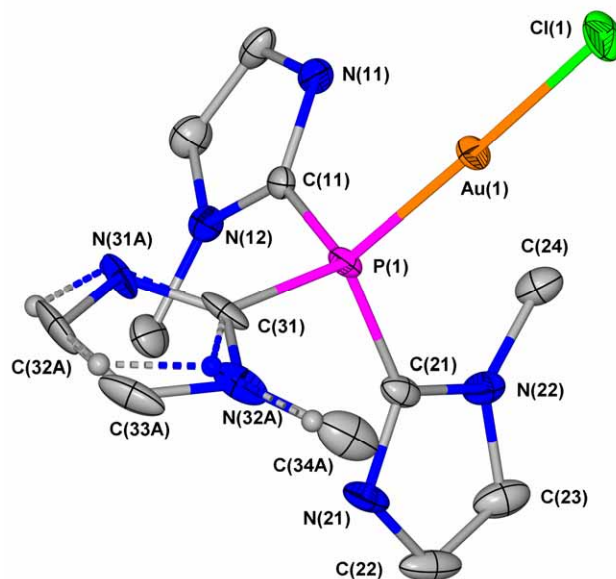

Fig. S2 Molecular structure of 2a. The minor orientation of the methylimidazole ring containing C(31) is shown as spheres of arbitrary radius.

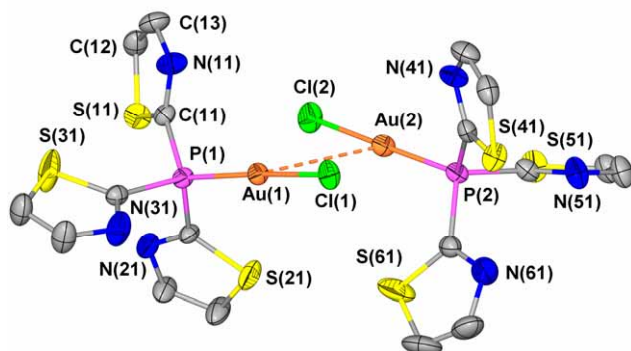

Fig. S3 Molecular structure of 2b(i).

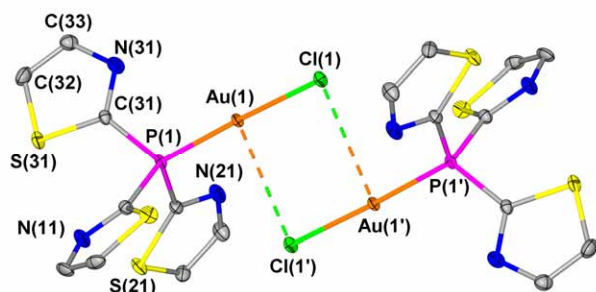

Fig. S5 Molecular structure of 2b(iii).

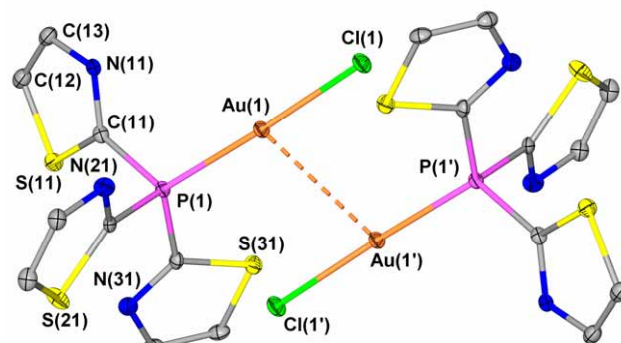

Fig. S4 Molecular structure of 2b(ii).

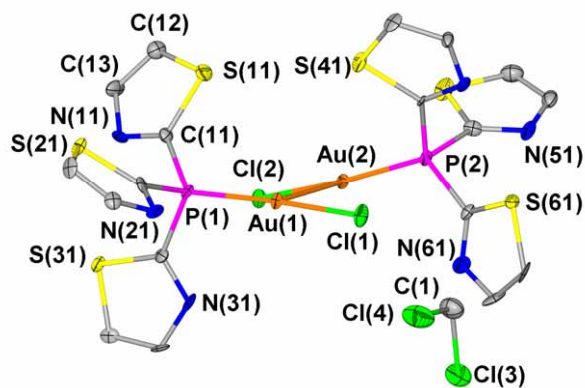

Fig. S6 Molecular structure of **2b**·CH<sub>2</sub>Cl<sub>2</sub>.

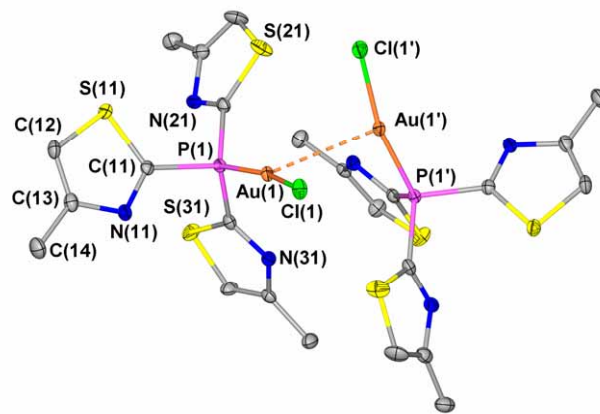

Fig. S7 Molecular structure of **2c(i)**.

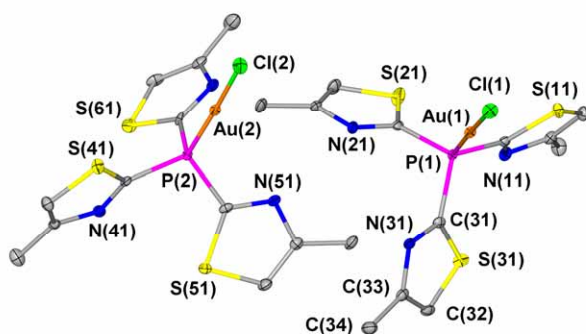

Fig. S8 Molecular structure of **2c(ii)**.

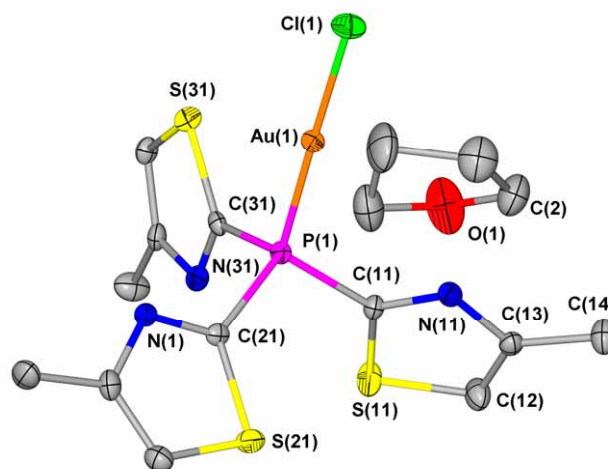

Fig. S9 Molecular structure of **2c**·thf.

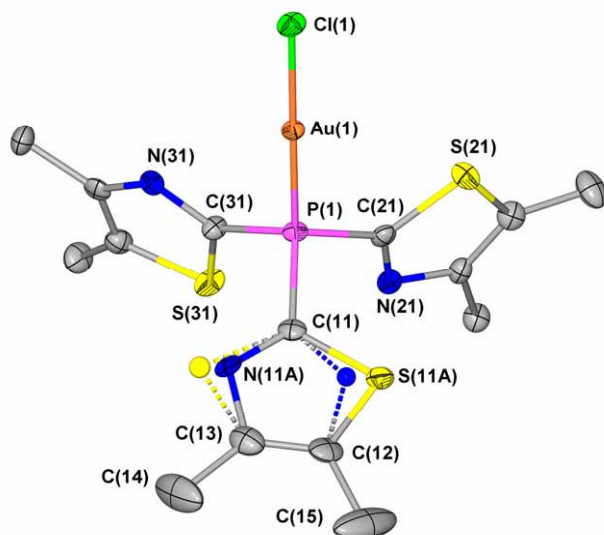

Fig. S10 Molecular structure of **2d**. The minor orientation of the thiazole ring containing C(11) is shown as spheres of arbitrary radius.

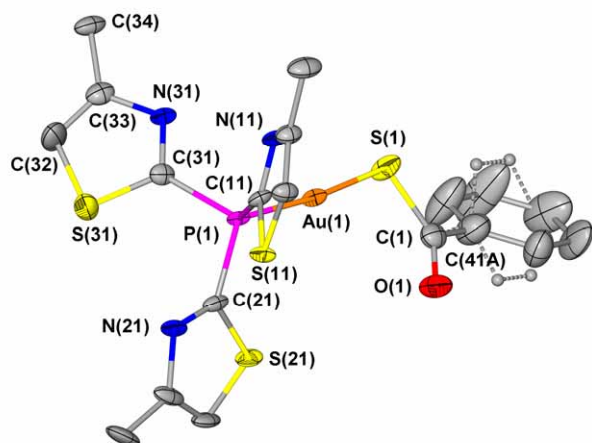

**Fig. S11** Molecular structure of **3b**·0.5C<sub>6</sub>H<sub>14</sub>. The hexane solvent is not shown; the minor orientation of the phenyl ring is shown as spheres of arbitrary radius.

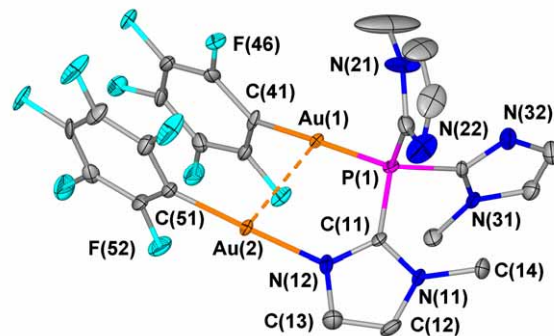

**Fig. S12** Molecular structure of **4**·Me<sub>2</sub>CO. The acetone solvent is omitted.

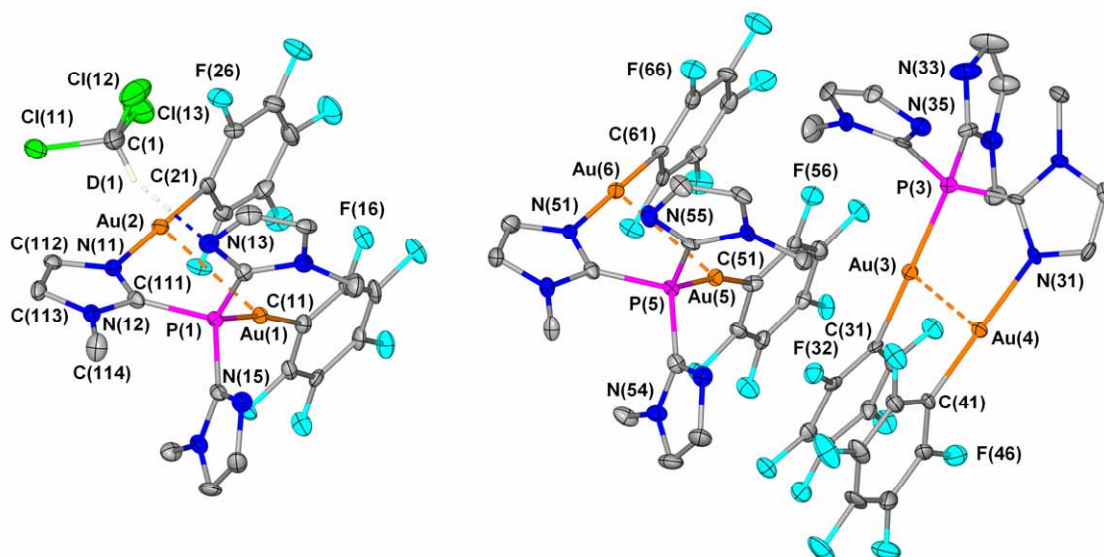

**Fig. S13** Molecular structure of **4**·0.83CDCl<sub>3</sub>. Only the deuteriotrichloromethane engaged in a hydrogen bond is displayed.
